27. Tang WH, Girod JP, Lee MJ, Starling RC, Young JB, Van Lente F, Francis GS. Plasma B-type natriuretic peptide levels in ambulatory patients with established chronic symptomatic systolic heart failure. *Circulation* 2003;**108**:2964–2966.
28. Atisha D, Bhalla MA, Morrison LK, Felicio L, Clopton P, Gardetto N, Kazanegra R, Chiu A, Maisel AS. A prospective study in the search of an optimal B-natriuretic level to screen patients for cardiac dysfunction. *Am Heart J* 2004;**148**:518–523.
29. Tschöpe C, Kasner M, Westermann D, Gaub R, Poller WC, Schultheiss HP. The role of NT-proBNP in the diagnostics of isolated diastolic dysfunction: correlation with echocardiographic and invasive measurements. *Eur Heart J* 2005;**26**:2277–2284.
30. Paulus WJ, Tschöpe C, Sanderson JE, Rusconi C, Flachskampf FA, Rademakers FE, Marino P, Smiseth OA, De Keulenaer G, Leite-Moreira AF, Borbély A, Edes I, Handoko ML, Heymans S, Pezzali N, Pieske B, Dickstein K, Fraser AG, Brutsaert DL. How to diagnose diastolic heart failure: a consensus statement on the diagnosis of heart failure with normal left ventricular ejection fraction by the Heart Failure and Echocardiography Associations of the European Society of Cardiology. *Eur Heart J* 2007;**28**:2539–2550.
31. DerSimonian R, Laird N. Meta-analysis in clinical trials. *Control Clin Trials* 1986;**7**:177–188.
32. Egger M, Davey Smith G, Schneider M, Minder C. Bias in meta-analysis detected by a simple, graphical test. *BMJ* 1997;**315**:629–634.
33. Hanley JA, McNeil BJ. The meaning and use of the area under the receiver operating characteristic (ROC) curve. *Radiology* 1982;**143**:29–36.

## CARDIOVASCULAR FLASHLIGHT

doi:10.1093/eurheartj/ehq087

Online publish-ahead-of-print 12 April 2010

### Small black holes in optical frequency domain imaging matches intravascular neoangiogenesis formation in histology

Marc Vorpahl, Masataka Nakano, and Renu Virmani\*

CVPath Institute Inc., 19 Firstfield Rd, Gaithersburg, MD, USA

\*Corresponding author. Email: rvirmani@cvpath.org

A 46-year-old white man with a family history of heart disease and myocardial infarction complains recently about indigestion and was found unresponsive in bed.

Post-mortem angiography (Panel A) showed an intraluminal haziness in the area of the mid-RCA (B/F and C/G) followed by a wide-open artery (D/H) and a severe luminal stenosis before the crux (E/I). Optical frequency domain imaging (OFDI; Terumo, Tokyo, Japan) (Panels B–D) and corresponding histology (Panels F–H) presented a ruptured plaque and a non-occlusive luminal thrombus and only mild circumferential luminal narrowing. Sections at the crux of the heart demonstrated a severe narrowing with an intact thin cap fibroatheroma (Panels E and I) with a large necrotic core (NC).

Several small (50–300  $\mu\text{m}$ ) black holes were observed in OFDI (Panel D) with a centrifugal sound enhancement (Panel J). Histology confirmed intravascular neoangiogenesis formation in the corresponding sections (Panels H and K).

**Conflict of interest:** M.V. and M.N. none declared. R.V. has received a research grant from Terumo Cooperation (Tokyo, Japan) and is a consultant for Terumo Cooperation (Tokyo, Japan).

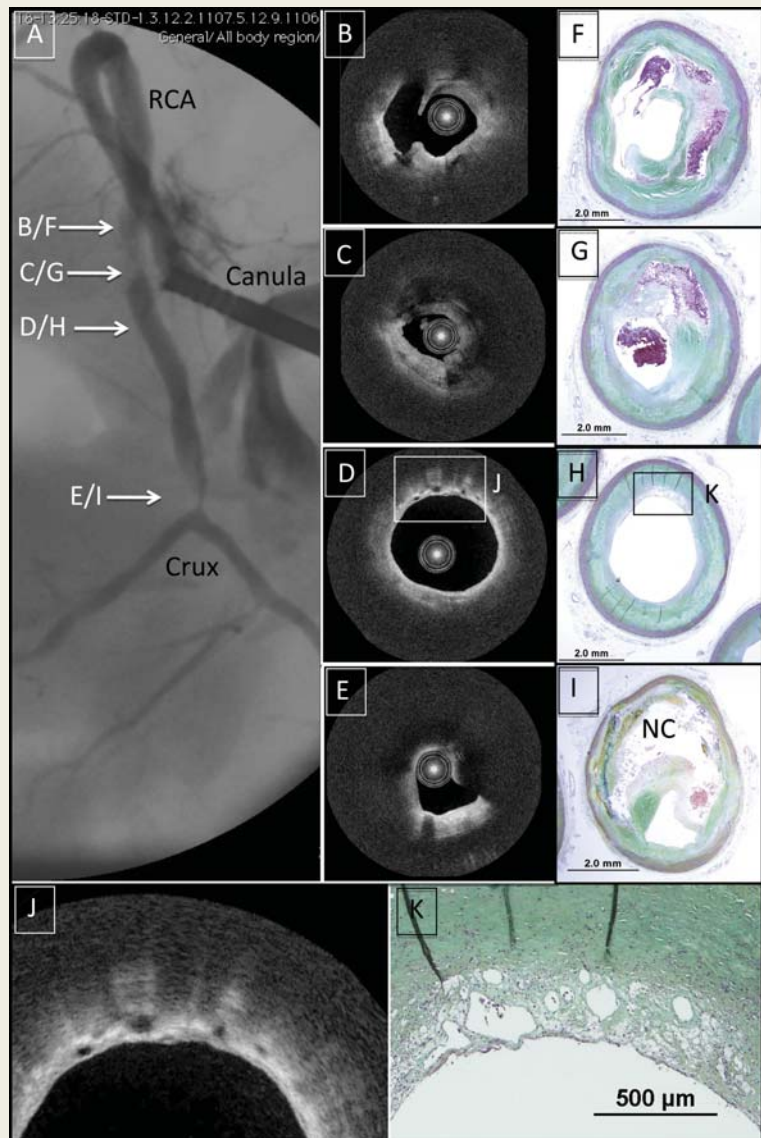

Source: https://academic.oup.com/eurheartj/article-pdf/31/15/1889/2027220/ehq087.pdf
